# Supplementary material for: Demethylation of the [Me3Sn(PhN2O2)]4 tetramer into dimeric [Me2Sn(PhN2O2)2]2: a thermally induced methyl-transfer between supramolecules
Source: Royal Society of Chemistry journal article supplement (doi:10.1039/b506728f), 2005-01-01
Supplement: b506728f.pdf [file b506728f.pdf]

# Supporting Information: Demethylation of the $[\text{Me}_3\text{Sn}(\text{PhN}_2\text{O}_2)]_4$ Tetramer into Dimeric $[\text{Me}_2\text{Sn}(\text{PhN}_2\text{O}_2)]_2$ : A Thermally Induced Methyl-Transfer between Supramolecules

Andrea Deák\* and Gábor Tárkányi

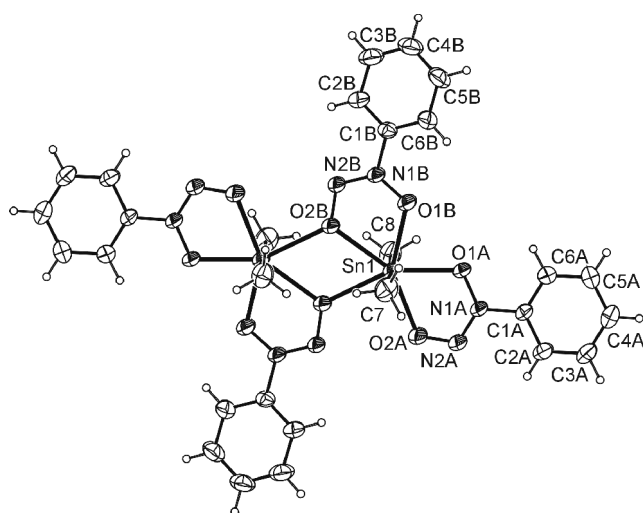

Fig. S1 The molecular structure of **2** with atom numbering. Displacement ellipsoids are drawn at the 30% probability level.

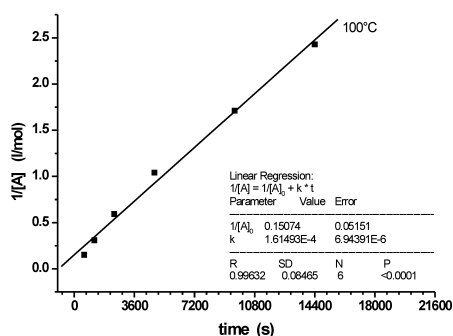

Fig. S2 The  $[A]^{-1}$  vs  $t$  plot used for the estimation of the  $k$  rate constant of the process  $2A \rightarrow B + C$ , where  $[A]$  is the molar concentration of the monomeric  $[\text{Me}_3\text{Sn}(\text{PhN}_2\text{O}_2)]_1$  in the melt and  $t$  is the time in seconds spent at  $100^\circ\text{C}$ . An approximate density of  $2.0 \text{ kg/m}^3$  for the melt was used for the calculation of the initial concentration  $[A]_0$ .

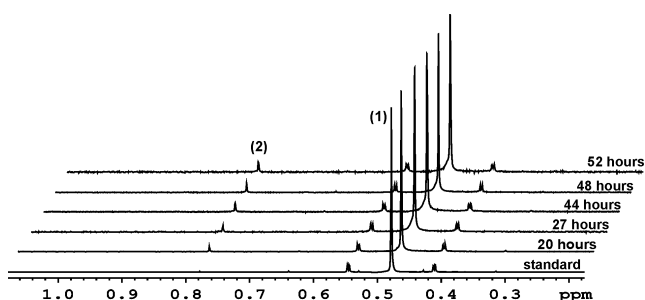

Fig. S3 Aliphatic region of the  $^1\text{H-NMR}$  spectra ( $\text{CDCl}_3$ ,  $25^\circ\text{C}$ , 400 MHz) used for the component analysis of **1** after keeping the crystals at  $70^\circ\text{C}$  in open vials for various durations.

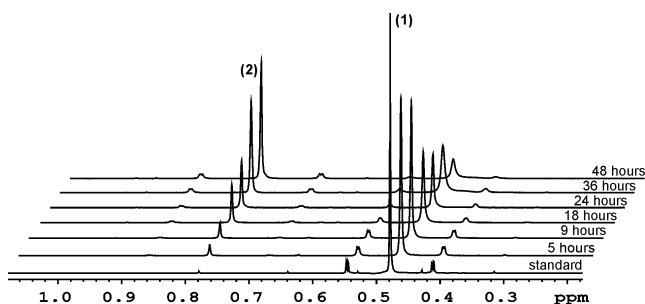

Fig. S4 Aliphatic region of the  $^1\text{H-NMR}$  spectra ( $\text{CDCl}_3$ ,  $25^\circ\text{C}$ , 400 MHz) used for the component analysis of **1** after keeping the crystals at  $86^\circ\text{C}$  in open vials for various durations.

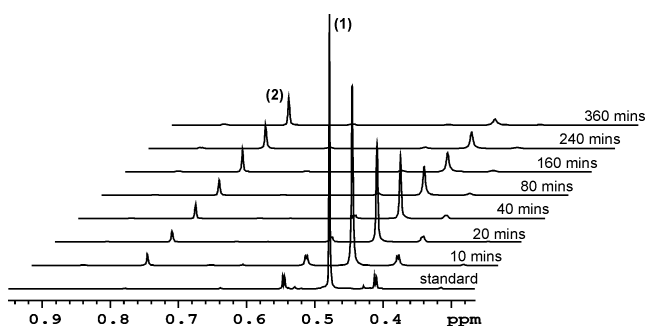

Fig. S5 Aliphatic region of the  $^1\text{H-NMR}$  spectra ( $\text{CDCl}_3$ ,  $25^\circ\text{C}$ , 400 MHz) used for the component analysis of **1** after keeping the crystals melt at  $100^\circ\text{C}$  in open vials for various durations.

Andrea Deák\* and Gábor Tárkányi  
 Institute of Structural Chemistry, Chemical Research Center, Hungarian Academy of Sciences, P. O. Box 17, H-1525 Budapest, Hungary. Fax: 00-36-1-438-4141/201; Tel: 00-36-1-325-7547; E-mail: [deak@chemres.hu](mailto:deak@chemres.hu)
